# Supplementary material for: P. falciparum Infection Durations and Infectiousness Are Shaped by Antigenic Variation and Innate and Adaptive Host Immunity in a Mathematical Model
Source: PLoS One. 2012 Sep 19;7(9):e44950. doi: 10.1371/journal.pone.0044950 (PMC3446976; doi:10.1371/journal.pone.0044950)
Supplement: Table S1 — Biological input parameters of the model. (DOC) [file pone.0044950.s001.doc]

**Table S1:** Summary of biological input parameters

| Immunological |  |  |  |
| --- | --- | --- | --- |
| X50,innate | Parasitemia at which innate immune response rate is half of maximum | Cinnate | Rate at which innate immune system kills IRBCs |
| X50,capacity | Parasitemia at which antibody immune response rate is half of maximum | Cantibody | Rate at which specific antibodies kill IRBCs |
| τinnate | Inverse of maximum innate immune response rate | Cminormod | Modification of antibody kill rate for minor epitopes |
| τcapacity | Inverse of maximum antibody response rate | Cmerozoite | Maximum blocking of merozoite invasion by MSP antibodies |
| τhyperimmunity | Inverse of rate of development of hyperimmunity | KMSP | Per cycle growth rate of MSP antibody response |
| kantibodymin | Minimum antibody response to antigen | Ymemory | Immunological memory level |
| kminormod | Modification of antibody response rate for minor epitopes | Thyperimmunity | Duration of hyperimmunity after removal of antigen |
| kgametocyte | Base success rate per female gametocyte in a mosquito | C50,gametocyte | Cytokine level Yinnate at which gametocyte inactivation is 0.5 |
| Parasitological |  |  |  |
| Nlivermerozoites | Merozoites per hepatic schizont | Kantigen | PfEMP-1 antigenic switch rate |
| NIRBCmerozoites | Merozoites per IRBC schizont | kgametocyte | Gametocyte production rate |
| Thepatocyte | Duration of liver-stage | Tgametocyte | Duration of gametocyte maturation |
| Tasexual | Duration of asexual cycle | τgametocyte | Decay of mature gametocytes |
| Nvariants | Number of PfEMP-1 variants per clone | nantigenswitch | Number of non-suppressed available variants per IRBC |
| Nminorepitopes | Minor epitopes per clone |  |  |

*kfever multiples Yinnate to get Yfever, which is multiplied by Cinnate, so kfever and Yfever are mathematically redundant and just present for scaling of the fever output)
